# Supplementary material for: ATM Kinase Inhibition Preferentially Sensitises PTEN-Deficient Prostate Tumour Cells to Ionising Radiation
Source: PubMed Central journal article supplement (PMC7794981; doi:10.3390/cancers13010079), 2020-12-30

Supplementary data  
**Supp Table 1 & 2.**

|          | <b>PC-3<br/>+PTEN</b> | <b>PC-3<br/>-PTEN</b> | <b>HCT-116 WT</b> | <b>HCT-116<br/>KO22</b> | <b>RWPE-1</b> |
|----------|-----------------------|-----------------------|-------------------|-------------------------|---------------|
| $\alpha$ | 0.32±0.04             | 0.27±0.07             | 0.28±0.05         | 0.36±0.09               | 0.46±0.08     |
| $\beta$  | 0.007±0.01            | 0.019±0.01            | 0.017±0.01        | 0.021±0.01              | 0.011±0.01    |
| SF2      | 0.52                  | 0.58                  | 0.54              | 0.45                    | 0.38          |
| SF4      | 0.23                  | 0.23                  | 0.25              | 0.17                    | 0.13          |

Radiation Sensitisation Enhancement Ratio of PTEN expression

|     | <b>PC-3</b>         | <b>HCT-116</b>      |
|-----|---------------------|---------------------|
| SER | 0.92 ( $p = 0.41$ ) | 0.68 ( $p = 0.02$ ) |

Supplementary data  
Supp Figure 1

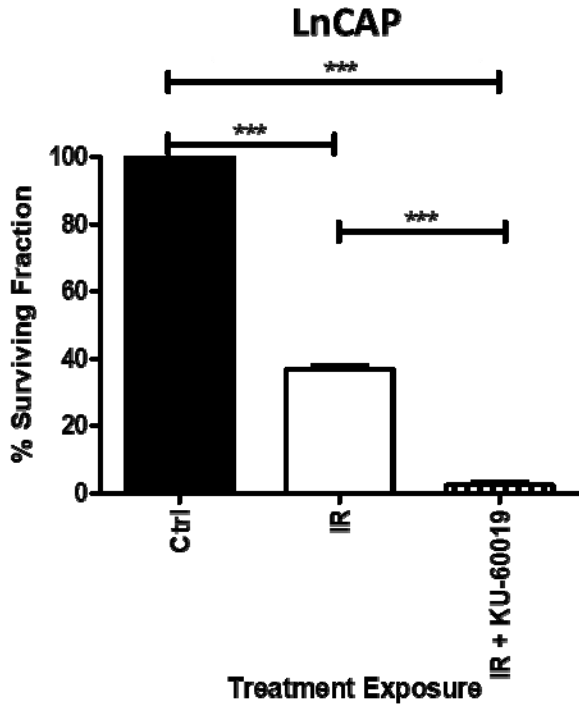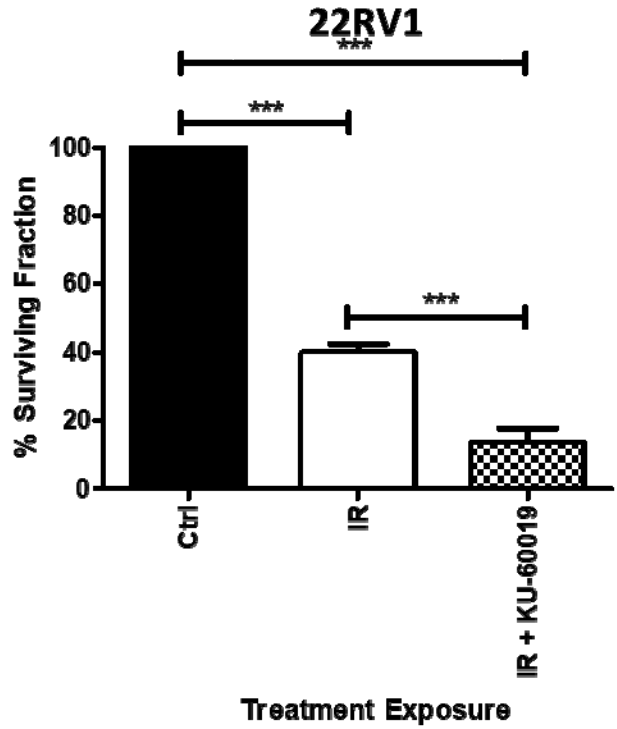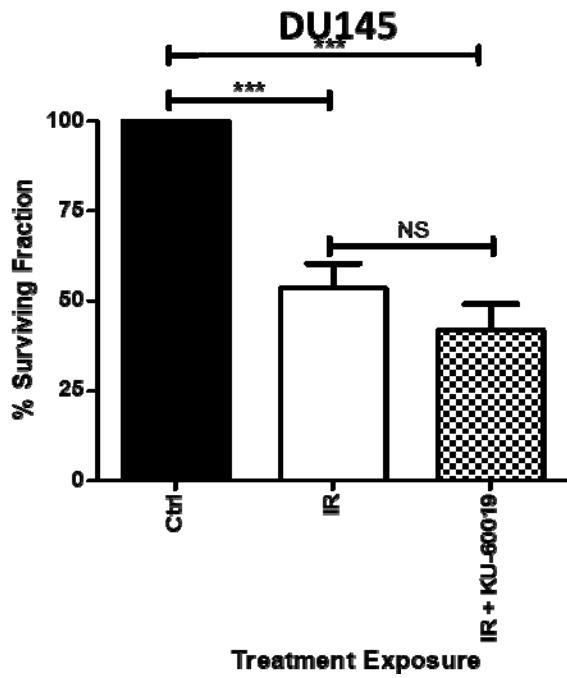

Supplementary data  
 Supp Figure 2

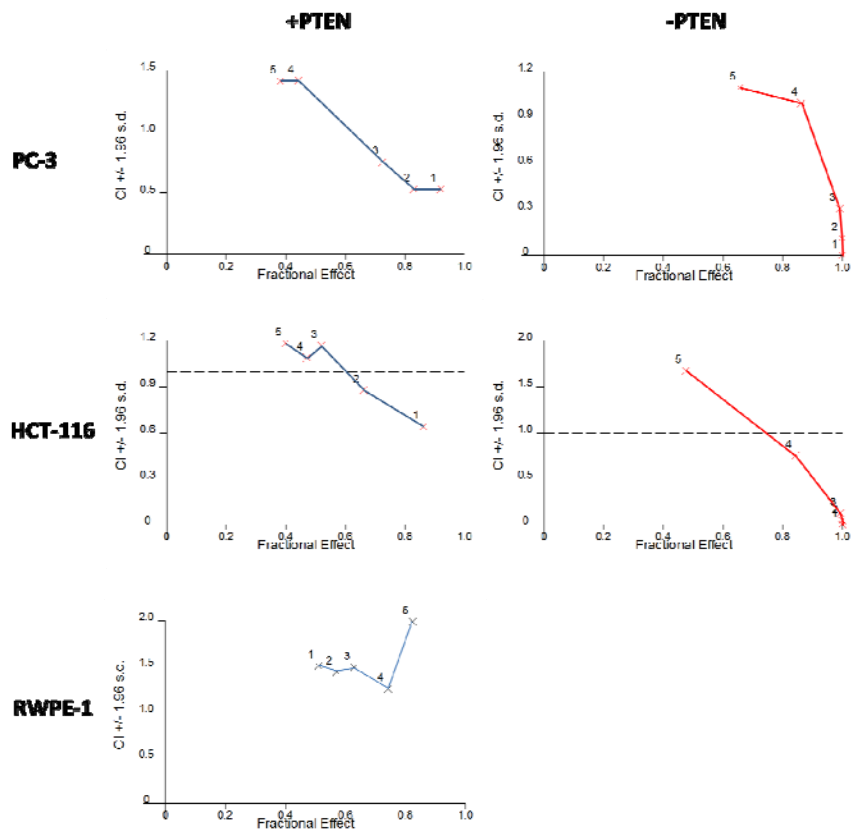

Supplementary data  
**Supp Table 3**

|                                         | <b>PC-3<br/>+PTEN</b> | <b>PC-3<br/>-PTEN</b> | <b>HCT-116<br/>WT</b> | <b>HCT-116<br/>KO22</b> | <b>RWPE1</b> |
|-----------------------------------------|-----------------------|-----------------------|-----------------------|-------------------------|--------------|
| SF (1 $\mu$ M)                          | 0.33                  | 0.03                  | 0.70                  | 0.19                    | 0.38         |
| SF (2-Gy + 1 $\mu$ M)                   | 0.17                  | 0.01                  | 0.34                  | 0.16                    | 0.26         |
| RER                                     | 1.94                  | 3.00                  | 2.06                  | 1.13                    | 1.47         |
| Combination Index<br>(2-Gy + 1 $\mu$ M) | 0.535                 | 0.115                 | 0.88                  | 0.13                    | 1.25         |

Supplementary data  
**Supp Table 4**

|                                                            | <b>PC-3 +PTEN</b>          | <b>PC-3<br/>-PTEN</b>      | <b>HCT-116<br/>WT</b>       | <b>HCT-116<br/>KO22</b>    |
|------------------------------------------------------------|----------------------------|----------------------------|-----------------------------|----------------------------|
| SF <sub>0.25</sub> Dose<br>(IR)                            | 4.08                       | 3.82                       | 3.94                        | 3.23                       |
| SF <sub>0.25</sub> Dose<br>(IR + [LC <sub>50</sub> -PTEN]) | 4.41                       | 2.33                       | 3.75                        | 2.33                       |
| DER                                                        | 0.93 ( <i>p</i> =<br>0.03) | 1.64 ( <i>p</i> =<br>0.01) | 1.05 ( <i>p</i> =<br>0.019) | 1.39 ( <i>p</i> =<br>0.02) |

Supplementary data  
Supp Figure 3

**A**

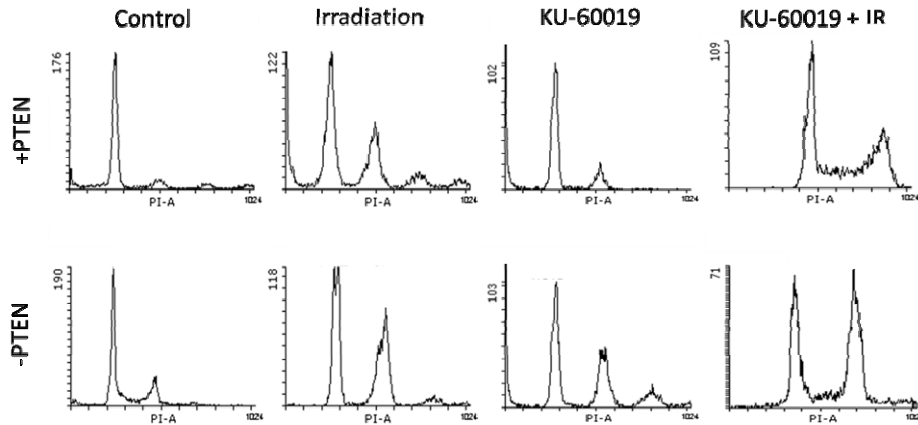

|      | +PTEN Control | -PTEN Control | +PTEN IR | -PTEN IR | +PTEN KU-60019 | -PTEN KU-60019 | +PTEN KU-60019 + IR | -PTEN KU-60019 + IR |
|------|---------------|---------------|----------|----------|----------------|----------------|---------------------|---------------------|
| G1   | 72            | 50            | 58       | 47       | 56             | 42             | 49                  | 40                  |
| S    | 7             | 19            | 5        | 9        | 12             | 12             | 10                  | 5                   |
| G2/M | 14            | 27            | 27       | 36       | 27             | 39             | 33                  | 48                  |

**B**

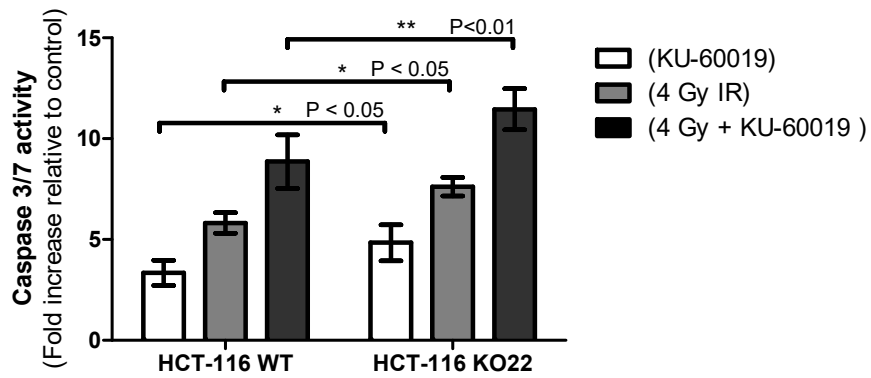

Supplementary data  
**Supp Figure 4**

**A**

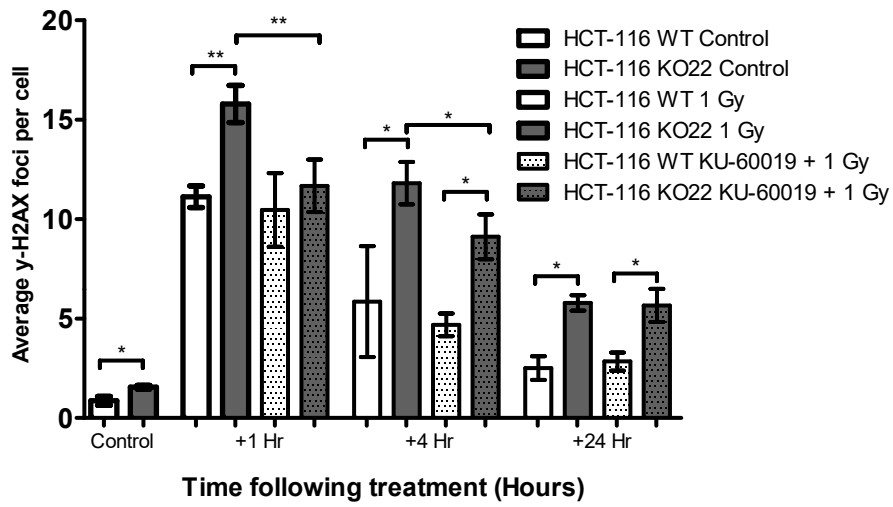

**B**

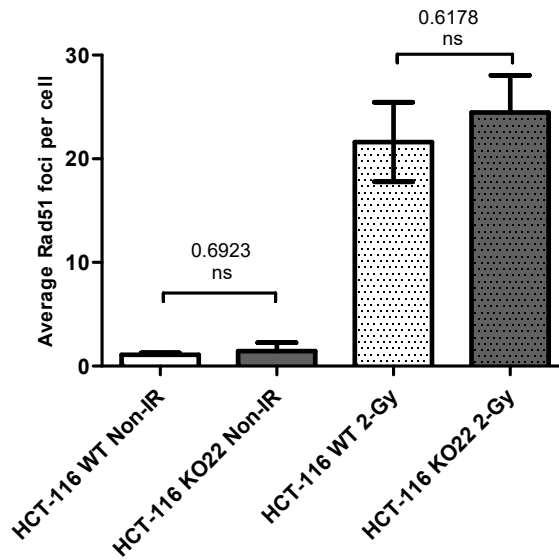

**C**

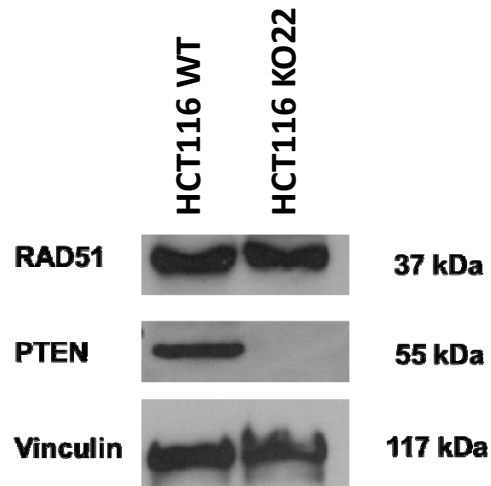

Supplementary data  
Supp Figure 5

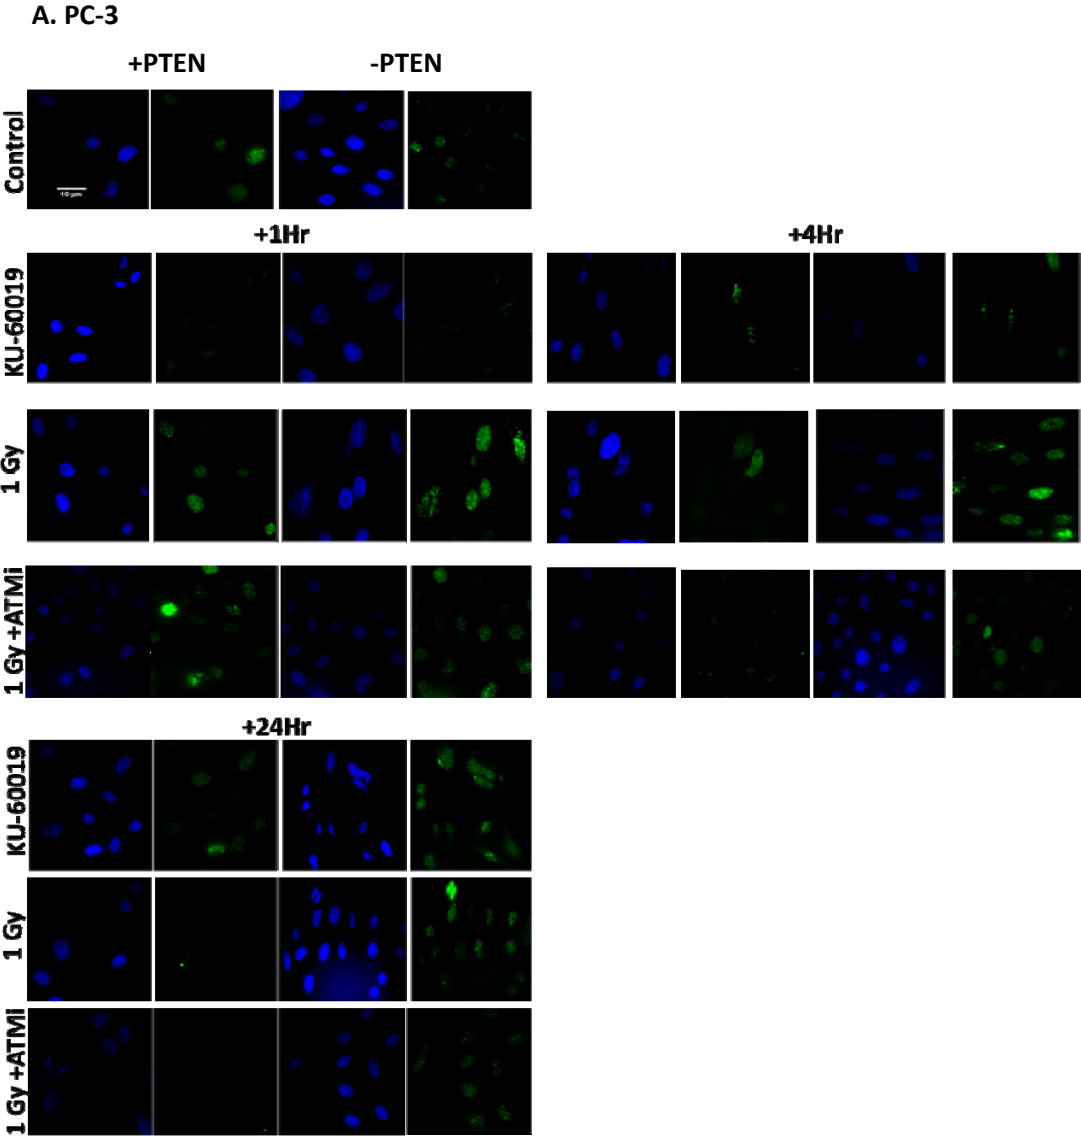



Supplementary data  
Supp Figure 5

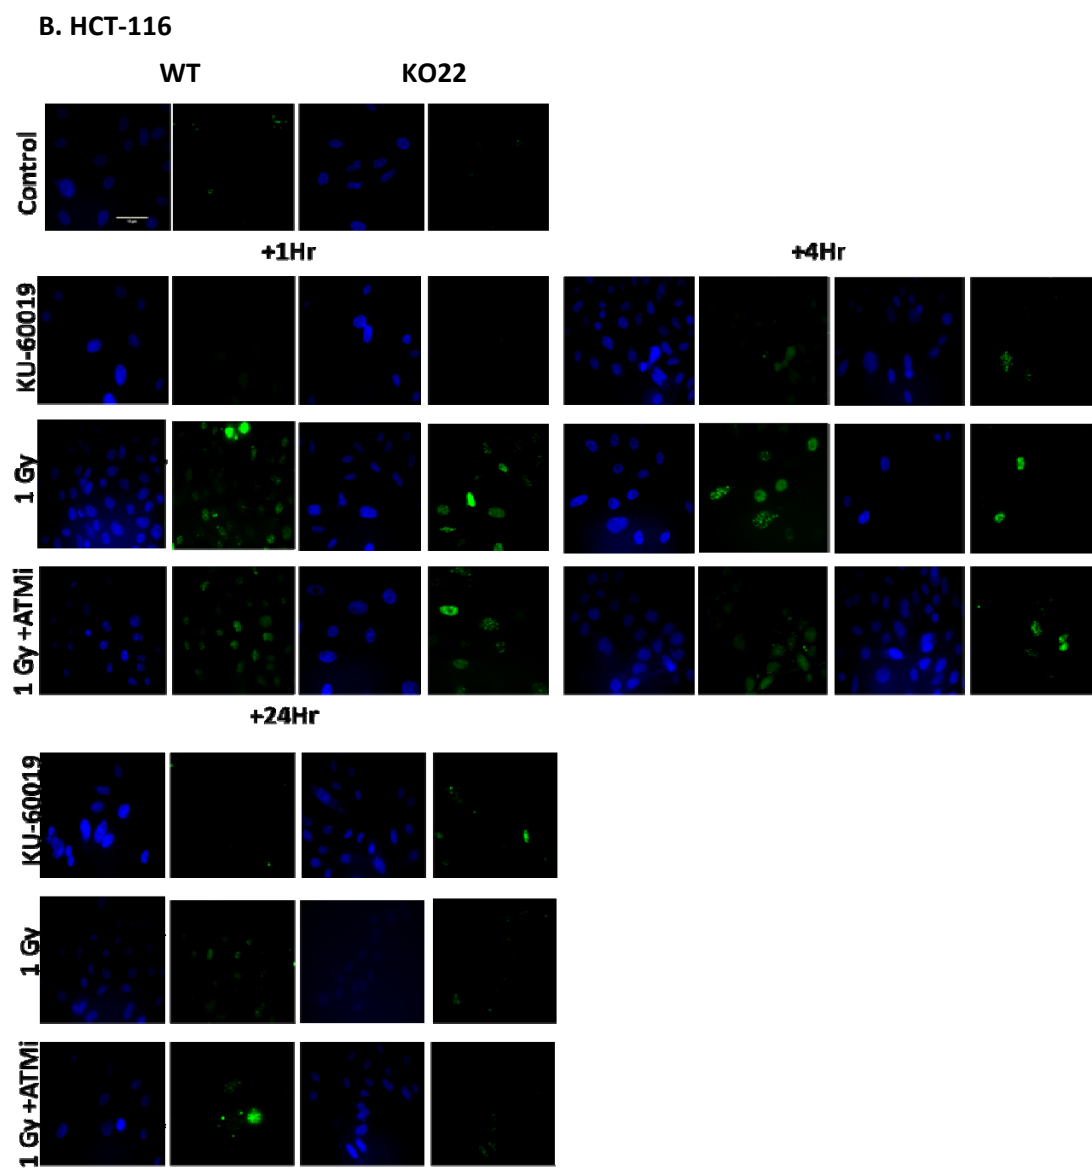

Supplementary data  
Supp Figure 6

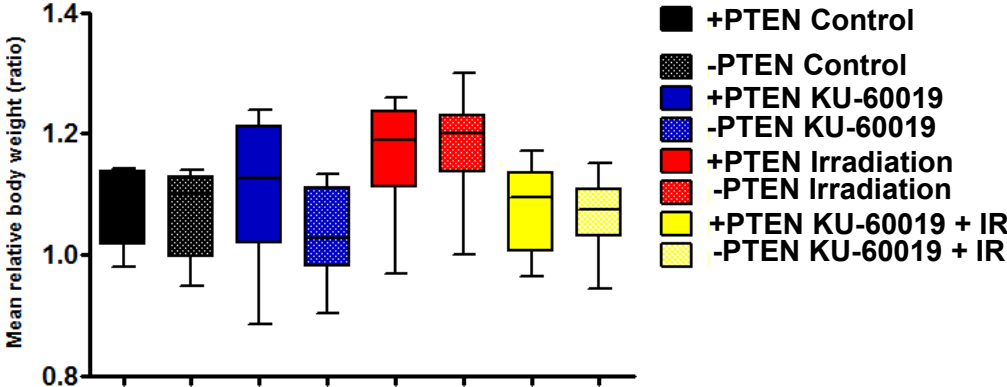

# Supplementary data

## Supp Figure 7

|      |   |   |   |   |   |   |   |   |
|------|---|---|---|---|---|---|---|---|
| ATM  | - | - | - | - | + | + | + | + |
| 2Gy  | - | - | + | + | - | - | + | + |
| PTEN | - | + | - | + | - | + | - | + |

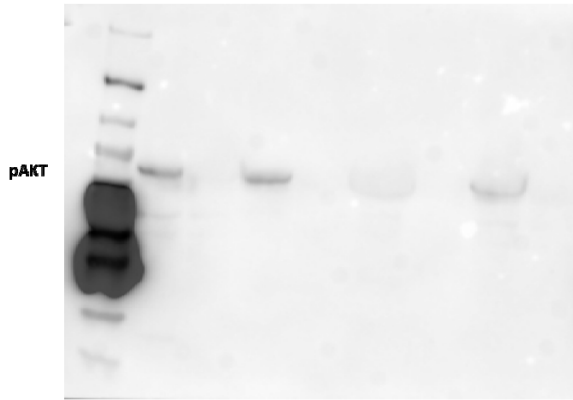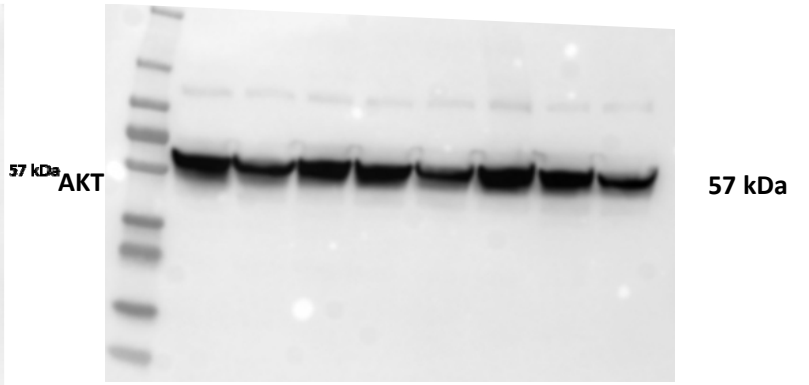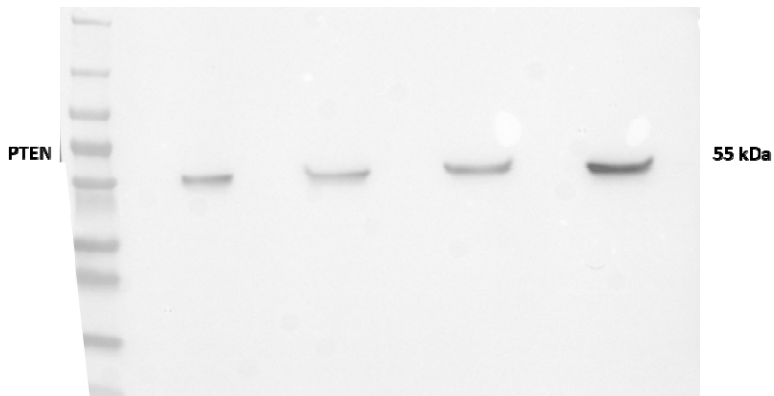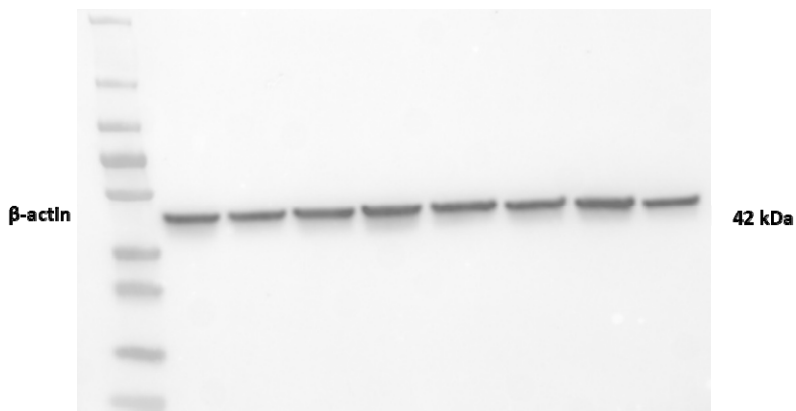

Supplement: cancers-13-00079-s001.pdf [file cancers-13-00079-s001.pdf]
